# Supplementary material
Source: publisher figshare collection journal article supplement (https://gsajournals.figshare.com/ndownloader/files/25833950)
Supplement: Supplementary file 1 [file 25833950]

**Figure S1**. Three Paxton Lake contigs contained regions that did not align in a linear fashion. These contigs caused erroneous gap closing of the v. 5 reference assembly using LR_Gapcloser. The small regions aligning incorrectly are shown with a circle. This region was used by LR_Gapcloser to erroneously ligate the two regions of the contig, causing a decrease in chromosome scaffold length. These three contigs were removed from the assembly.
